# Supplementary material for: Exposure–Response Analysis of Overall Survival for Tremelimumab in Unresectable Malignant Mesothelioma: The Confounding Effect of Disease Status
Source: PubMed Central journal article supplement — Clin Transl Sci. 2019 Apr 12;12(5):450–8. doi: 10.1111/cts.12633 (PMC6742946; doi:10.1111/cts.12633), 2019-04-12
Supplement: CTS-12-450-s002.pdf [file CTS-12-450-s002.pdf]

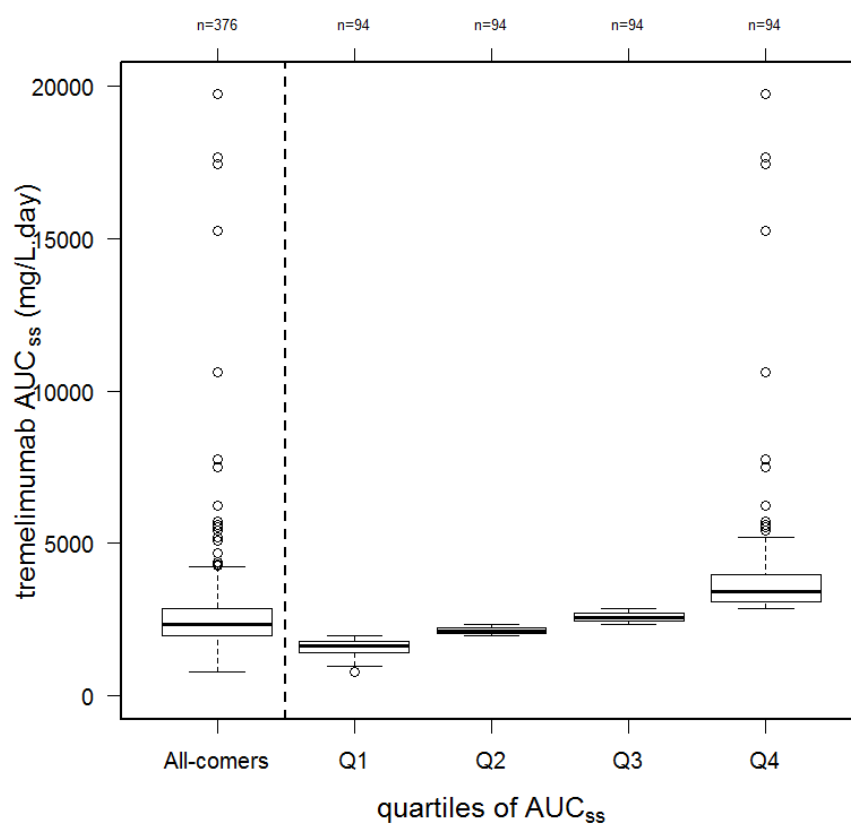

**Figure S2.** Distribution of tremelimumab predicted exposure at steady-state (AUC<sub>ss</sub>) in all-comers and across each quartile (Q1 = lowest exposure, Q3-Q2 = interquartile range, and Q4 = highest exposure; top left panel).
