# Supplementary material for: Exposure–Response Analysis of Overall Survival for Tremelimumab in Unresectable Malignant Mesothelioma: The Confounding Effect of Disease Status
Source: PubMed Central journal article supplement — Clin Transl Sci. 2019 Apr 12;12(5):450–8. doi: 10.1111/cts.12633 (PMC6742946; doi:10.1111/cts.12633), 2019-04-12
Supplement: CTS-12-450-s003.pdf [file CTS-12-450-s003.pdf]

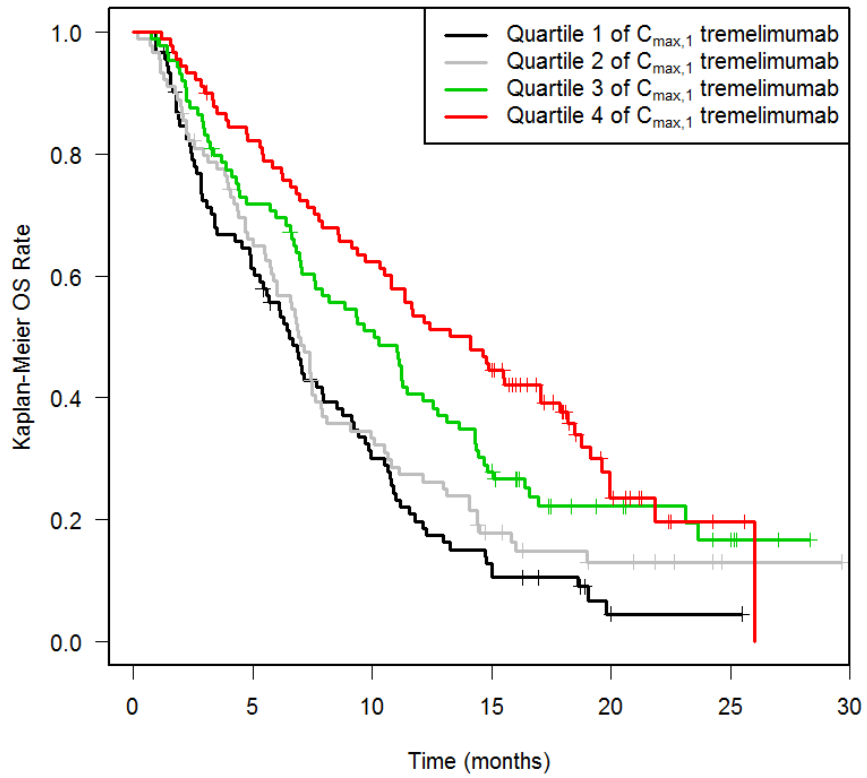

**Figure S3.** Kaplan-Meier sensitivity analysis of OS by quartiles of observed exposure levels after the end of infusion of the first dose of tremelimumab ( $C_{max,1}$ ) for the tremelimumab-treated group.
