# Supplementary material for: Exposure–Response Analysis of Overall Survival for Tremelimumab in Unresectable Malignant Mesothelioma: The Confounding Effect of Disease Status
Source: PubMed Central journal article supplement — Clin Transl Sci. 2019 Apr 12;12(5):450–8. doi: 10.1111/cts.12633 (PMC6742946; doi:10.1111/cts.12633), 2019-04-12
Supplement: CTS-12-450-s004.pdf [file CTS-12-450-s004.pdf]

## SUPPLEMENTARY MATERIALS

### Exposure-response analysis of overall survival for tremelimumab in unresectable malignant mesothelioma: the confounding effect of disease status

Paul Baverel, Lorin Roskos, Manasa Tatipalli, Nancy Lee, Paul Stockman, Maria Taboada, Paolo Vicini, Kevin Horgan, Rajesh Narwal

## METHODS

### *Step 1 - Base population PK model development*

The base model consists of the structural model (describing the mean profile within the treated population) and the stochastic model (comprising unexplained inter-individual variability in PK and residual error). Based on prior modeling of tremelimumab (1,2), the chosen base structural PK model was a two-compartment linear model.

When supported by the data, model parameters were described as multivariate log-normal distributions:

$$P_i = P_{avg} \bullet \exp(\eta_{P,i})$$

where  $P_i$  is the value of a parameter  $P$  for the  $i^{\text{th}}$  individual,  $P_{avg}$  is the population average of the parameter, and  $\eta_{P,i}$  is a realization of a normally distributed random variable with a mean of zero and a variance of  $\Omega_P^2$  (i.e.,  $\eta_{P,i} \sim N(0, \Omega_P^2)$ ).

A proportional error model was used to describe the residual unexplained, random variability:

$$C(t)_{ij} = \hat{C}(t)_{ij} \bullet (1 + \varepsilon_{pij})$$

where  $C(t)_{ij}$  is the  $j^{\text{th}}$  observed concentration of individual  $i$ ;  $\hat{C}(t)_{ij}$  is the  $j^{\text{th}}$  model predicted value (plasma concentration) for individual  $i$ ;  $t$  is the time; and  $\varepsilon_{pij}$  is a normally distributed residual random error, with mean of 0 and variances of  $\sigma^2$ .

Model selection was based on successful minimization and completion of the covariance step in NONMEM, and diagnostics used included assessment of standard goodness-of-fit plots, reductions in NONMEM objective function value (OFV) for hierarchical models for model selection, and parameter plausibility and imprecision. The method used for estimating the parameters of the mixed-effects model was the first-order conditional estimation with  $\epsilon$  and  $\eta$  interaction (FOCE INTER) (3–5).

*Step 2: Exposure–Efficacy (OS) Analysis and confounding analysis*

AUC<sub>ss</sub> was the preferred exposure metric as opposed to CL to conduct the exposure-efficacy analysis as it accounts for the higher dose administered in heavier patients than cachexic patients given that tremelimumab was given in a per-Kg basis and the potential confounding role of catabolism of any exposure-response in cancer. A sensitivity analysis was performed by repeating the Kaplan-Meier empirical evaluation split by quartiles of exposure with observed concentration measurements after end of infusion at the first cycle of treatment ( $C_{\max,1}$ ), instead of predicted AUC<sub>ss</sub>.

*Step 3: Covariate analysis to confirm potential PK predictors*

PK parameter–covariate relationships were first examined graphically and correlation between covariates was investigated. Only covariates that showed a trend by graphical exploration were then evaluated within the nonlinear mixed-effects modelling framework to quantify their potential impact on tremelimumab PK. This way, statistical tests of covariate-parameter relationships suggested by the graphical analysis were assessed with the likelihood ratio test (LRT). The LRT is based on the property that the difference of the NONMEM objective function values (OFV) of two hierarchical models ( $-2 \log$ -likelihood) is asymptotically  $\chi^2$  distributed. Covariate effects found statistically significant ( $p < 0.05$ ) were then evaluated for clinical relevance, defined *a priori* as a change of 30% in PK parameter compared to a typical patient at the extremes of the distribution for a continuous covariate (taken as the 10<sup>th</sup> and 90<sup>th</sup> percentiles) or at each subcategory of interest for a categorical covariate.

## SUPPLEMENTARY REFERENCES

1. Wang E, Kang D, Bae K-S, Marshall MA, Pavlov D, Parivar K. Population pharmacokinetic and pharmacodynamic analysis of tremelimumab in patients with metastatic melanoma. *J Clin Pharmacol.* 2014;54(10):1108–16.
2. Calabro L, Narwal R, Robbins PB, Pietro AD, Cutaia O, Fonsatti E, et al. Pharmacokinetics of Tremelimumab, a fully human anti-CTLA-4 monoclonal antibody, in subjects with unresectable malignant mesothelioma. *AACR.* 2014;Abstr 228.
3. Wählby U, Jonsson EN, Karlsson MO. Assessment of actual significance levels for covariate effects in NONMEM. *J Pharmacokinet Pharmacodyn.* 2001;28(3):231–52.
4. Wählby U, Bouw MR, Jonsson EN, Karlsson MO. Assessment of type I error rates for the statistical sub-model in NONMEM. *J Pharmacokinet Pharmacodyn.* 2002;29(3):251–69.
5. Gobburu JVS, Lawrence J. Application of resampling techniques to estimate exact significance levels for covariate selection during nonlinear mixed effects model building: Some inferences. *Pharm Res.* 2002;19:92–8.
